# Supplementary material
Source: PubMed Central journal article supplement (PMC6439765)
Supplement: jama-321-165-s003.pdf [file jama-321-165-s003.pdf]

Burt RK, Balabanov R, Burman J, et al. Effect of nonmyeloablative hematopoietic stem cell transplantation vs continued disease-modifying therapy on disease progression in patients with relapsing-remitting multiple sclerosis: a randomized clinical trial [published January 15, 2019]. *JAMA*. doi:10.1001/jama.2018.18743

## **Data Sharing Statement**

### **Data**

**Data available:** No
